# Supplementary material
Source: PubMed Central journal article supplement (PMC8195535)
Supplement: kiab131_supplementary_data.pdf [file kiab131_supplementary_data.pdf]

**A**

|    |                                                                  |     |
|----|------------------------------------------------------------------|-----|
| Sc | -----                                                            | 0   |
| At | -----                                                            | 0   |
| Pp | -----                                                            | 0   |
| Sv | -----                                                            | 0   |
| Ah | -----                                                            | 0   |
| Ls | -----                                                            | 0   |
| Cs | MIV-----YLTLFVELTLYFLVKSL---QEG-----TTIM---                      | 27  |
| Vv | MPTWLAEICSFELTLFE-LLRYAFRKNRETVRESKEIEAAVEEEEEEDSEDSVFAVMDHK     | 59  |
| Ca | -----                                                            | 0   |
| Nb | -----                                                            | 0   |
| St | -----                                                            | 0   |
| Sc | -----                                                            | 0   |
| At | MDTGQSS-----IEPYQAKSFSRE--SSVASSLS-----LSRS--LPHLIDNDV---        | 40  |
| Pp | ---MAELVV-G-----GTGDESP-----                                     | 14  |
| Sv | MDSSSARSNASAEENCL-GYTRSASMDSAAPPLAVRSGSMLSRSS-----RQG---         | 47  |
| Ah | MDTGQSS-----IEPYRTKSFSRE---SSVASSLS-----LSRS--LPHLIDNDV---       | 40  |
| Ls | MDYGHND-----CEPRRSGSFSRI---SSTNSSFRRQSFNFNQ-----SGANDDS--        | 42  |
| Cs | DLE-----L-GVSGRRSFNRA-----GSAGSSLRRRSFGFTNA-ESTQK--DDDL--        | 68  |
| Vv | TND-----L-EETRSGSFGRS-----SSAGSSLRRRSCGLPGP-VPPQM--DDDI--        | 100 |
| Ca | MRKDR--EEMTLGGPRRSKSLNRA-----SSVKSSLRRHSFGS-FHV-SHNQG-DDDT--     | 48  |
| Nb | MDCENKDS---DLRKIGS-----SRT---SSATSSLRRRSLSLSFSLPKRLNDDDDDE       | 46  |
| St | MDSSENKDS---ELRKFGS-----SRT---SSASSLRRRSLSLSLSLPKQLNDDDD--       | 45  |
| Sc | -----                                                            | 0   |
| At | DSESVSEAGDIGDRSLRRRHS-A-GR---SSR-L-----                          | 68  |
| Pp | DRLTLTQCMSLPDVAQ--RRHSWHADMSQNQATIPNF-----DILRAQKIEVTEV----      | 62  |
| Sv | SRGSISLSREMGDSILNSMRHSLQS---ADQ-LLGDVDSVLAQLIESGRILAPEVDANE      | 103 |
| Ah | DSESVSEAGDIGDRSLRRRHS-A-GR---SSR-L-----                          | 68  |
| Ls | DHLSVSEAGDIGDRALHSKRHS-GNE---SGR-P-----                          | 71  |
| Cs | ESETVSEAGDTGDRALRSNSYSESS---RQQ-L-----                           | 97  |
| Vv | ESETVSEQAGDIGDRALHSNRISSESS---SFR-L-----                         | 129 |
| Ca | ESEAVSEAGDIGDRALHSRRSSESG---RGR-I-----                           | 77  |
| Nb | ESESVSEAGDIGDRELQSNRYSGSG---RLR-L-----                           | 75  |
| St | ENESVSEAGDIGDRELQSNRYSGSG---RLR-L-----                           | 74  |
| Sc | -----                                                            | 6   |
| At | SADDFIEQGTHDTSRQEQ-----DILHDLRAFNTASVNKTLPEEDITASPLPTKSLLSPE     | 122 |
| Pp | DIASGIELYQFRSGPEDASDTAASASAAEKRESQDDIICFDLPCTQNTFPLERREL----     | 116 |
| Sv | DIANALEHHKVGPLPDDAMMPNNGKIAAAP-----VSSV-----ETKDIISNAP           | 147 |
| Ah | SADDLMEQGTHDTSRQEQ-----DVLHDLRAFNTASVNKPLPEEDITASPLPTKSLLSPE     | 122 |
| Ls | VFP--FEENLVLPIQEHFSKE-----SHL-PTPSPSPDAIL--H                     | 106 |
| Cs | PVDNVTETGSVVP I PEDALFRPHGFWSHDPTALAVASPVFPSTM-ETISPLSTEAVI--H   | 154 |
| Vv | SFDNLLDNGVVVPI PENSLLKPHEIWFRRDATANT-VSPASPLPL-EIISPLSSDAMV--Y   | 185 |
| Ca | SIDNVVESGVIVPILEDASLQPTGFSPHKTTTTFNTEALPSSTL-DIALGSSADGTA--Q     | 134 |
| Nb | IGENAPEHGVVVPISVEWSDPNAMSSVA-----PV-----SSSKLIL--Q               | 114 |
| St | IGENAPEHGVVVPISED-----TSSVT-----PV-----FPIKLIS--Q                | 106 |
| Sc | ISN-----HKLSHYIHVFCTFTTFCILGTETRQAITALSTYTPAFVVTAP--TV---        | 52  |
| At | INNSGKEEERVLPKSLEYISCLIH LAVFGIFGAITRYLLQK LFGPTGARVTS DGSILYLD  | 182 |
| Pp | QSTNVEEESERLSPTLEYVSALAHLTTFGILGVCIRHGLEL LFS-GIANVTSENSPLFID    | 175 |
| Sv | ADSSTKVEPYKLSLR LDYAAYMIHLAVFGFFGVFTRYGLQK LFGPECLALTS DQSPLYPD  | 207 |
| Ah | INNPEKEEERVLPKSLDYISCLIH LAVFGIFGAITRYLLQK LFGPTGARVTS DGSILYLD  | 182 |
| Ls | DKGQNDCKKELPWFMTYISSRVHLAVLGILGVLTRYLLEK LFGPQVVGATSDNSYMYVD     | 166 |
| Cs | SDDKQENRKELPWL LDYTSCLLHLAVFGILGVLTRYLLQK LFGPGVIGATSDQSILYLD    | 214 |
| Vv | SADKDEDNKKELPWLVEYISCLIH LAVLGILGALT RYLLQK LFGPGVASLTS NQSILYLD | 245 |
| Ca | LEDKKNENEKAIPWILEYISCLSFLALFGILGVITRFYLLQK LFGPRVIGATSDQSYMPD    | 194 |
| Nb | TEHKKNEEKTEVPWVLEYASCLLFLAVFGILGVLLRYGLQILFGPRIVGATSDHSYMYLD     | 174 |
| St | PDHKKNDEKTEVPWVLEYTSCLLFLAVFGILGVLLRYGLQK LFGPGIVGATSDHSYMYLD    | 166 |
|    | * * GxxxR * * *                                                  |     |
| Sc | LWSNCSSCMLMGIMQSLNAYTWMKDHQVFLGVTTGYCGALSSFSSMLLEMFEHSTNLTN      | 112 |

At LPSNMVGSFSLMGWFGVVFKAADIARVSEFVAIGLSTGYLGSLLTTFSGWNQKMLDLSADGQ- 241  
 Pp LPANMLGCFMGWVGVSLKKEIANFSELLAIGLSTGLMGSIITTYASWNQAMIFLVTKGF- 234  
 Sv LPSNMLGSFSLMGWFGIIFKADIRHISDHLIVGITTYMGSLTTFSGWNQKMGVLSSTGH- 266  
 Ah LPSNMVGSFSLMGWFGIVFKADIARVSEFVAIGLSTGYLGSLLTTFSGWNQKMLDLSADGQ- 241  
 Ls LPPNMIGSFSLMGWFGVVFKGDISKFSPELAVGLTTGYLGSLLTTFSGWNQKMLELSVNGQ- 225  
 Cs LPSNMVGSFSLMGWFGVVFKGDISRVDHLAIGLTTGYLGSLLTTFSGWNQKMLDLSVQVK- 273  
 Vv LPSNMAGSFSLMGWVGWVVFKGDISSVSDQLAIGLTTGYLGSLLTTFSGWNQKMLDLSVDGQ- 304  
 Ca LPSNMVGSFSLMGWFGVVFKGDISEVSDNLAIGLTTGFGLSLLTTFSGWNQKMLDLSVRGH- 253  
 Nb LPSNMVGSFSLMGWFGAVFKEDISRFSSTLAIIGLSTGFGLSLLTTFSGWNQKMLDLSVEDQ- 233  
 St LPSNMVGSFSLMGWFGVVFKEDISRISSQLAIGLSTGFGLSLLTTFSGWNQKMLELSVEGQ- 225

\* \* \* \* \* \* \* \* \* \* \* \* \* \* \* \* \* \* \* \* \* \*

Sc GNIANHTKLPNRAYGIMEFLSVLLVHLMVSMGSLIFGRQLGKEVIVAYGSSSFKPYTPP 172  
 At -----WVYAVLGFLGLFLTSYSIILGVETAKGFKWLLHRRAS-SED--- 282  
 Pp -----WVRSIVSLIIGMEMSQMSELLVIGIDSATFLKSGLMHPKRVRI-- 277  
 Sv -----WVYAIAGIVLGMFIVNESITITIGAETGERLRSLLILKYIRERSSI-- 309  
 Ah -----WVYAVLGFLGLFLTSYSIILGVETAKGFKWLLHRRAS-SEE--- 282  
 Ls -----WVFSFLGFLGLFLVAYSFIFGVETAKGVKWFVFNKTNL-NSKC-- 267  
 Cs -----WGFVVLGFLVGMILADYSIKFIRTAQGLKWILEMSNL-FPVS-- 315  
 Vv -----WVFSVLGFLIGLFLAAYSIIIFGVETAKGFRWLLKRLNS-GGKR-- 346  
 Ca -----WVFAILGILIGLFLAAYSIIIFGIETAKGFKWLLKRFIR-EMK--- 294  
 Nb -----WVFSVLGFLIGLFLVAYSFIFGVETAKGVRWLYRRATM-NSF--- 274  
 St -----WVFSVLGFLGLFLVAYSIIIFGIETAKGVNWLYKRTNM-NSS--- 266

\* \* \* \* \*

Sc SDTVKENAGDVDTQEMEKNILEFKFKTPAPFFKFFFDIVDKLAYALAFPLIILFVVLCA- 231  
 At ----KFHCLKVNTFQSH-----IVSLTLMMLLLVALLTAS 313  
 Pp GWQKHWN-SPETLHRR-----KAGMLVFLAISIIILWAAC 311  
 Sv GHKYDWEQWRVDTRTKQ-----SVLLSVMMLMSFLWILS 344  
 Ah ----KNSCIKVNTFRSH-----IVSMTLMMLLLVALLTAS 313  
 Ls GFELKNN-----IISE-----SILIVLMITLLGLLWVVS 296  
 Cs GLPNSKSNWKADYCKRQ-----VAVLVVLLLMLGLLWVVS 350  
 Vv GILRSNGNWRVDSCKRH-----LAVMVVGMILIGLLYSLC 381  
 Ca -FFSSIIYSWDLQYNTY-----LTGTVVLLLILGVVWVVC 328  
 Nb -NSCTDYHWRVDSYKRH-----VLVILFLLFILFLLWVVS 308  
 St -NSGTDCHWRVDSCKHH-----LIVILFLLLILASLVVVS 300

Sc -----YYENYSRGWTLPLCLFGIFAGFLRYWLAEMFNKTN-----KKFPLGTFLAN 277  
 At SILLVKEFDKGTSEAQLWFGCLVAAPGVWLRWFLARLNGRGLGKDSQNLRWVPGFTLIAN 373  
 Pp LVLTVTDVNSYV-RRRLWLA CMVGPVWLRWFLARLNGQIGRN-HHLKWLPIGTLITN 369  
 Sv IALAVVKVRSADGAVLWVMGCSVPPGVWLRWFLARLNGQIGKQ-GSFKWLPIGTLAAN 403  
 Ah SILFVKEFDKGTSEAQLWLGCLVAAPGVWLRWFLARLNGRGLGKDRQNLKWPFGFTLIAN 373  
 Ls IALLKRDFESDKSTSQLWLG CIVGPIGVWIRWFYLAKFNGKGLGRQ-HIMKWPFGFTLIAN 355  
 Cs AALEKRDFHSGSSEAQLWLA CIVGPFVWIRWFLARLNGRGLGKA-GLWKWLPIGTLIAN 409  
 Vv GILEKREFQSGSSEAQLWLG CMVAPLVWIRWFLARFNGRGLGKA-GLFKWVPGFTLIAN 440  
 Ca IAFTKKQFYSDHSHAELLLG CIVGPFVWIRWFLARLNGRGLGKA-PVLRWVPGFTLIAN 387  
 Nb IGLEVTEFSSGSTKAQLWLA CIVGPFVWIRWFLARLNGRGLGKS-GLLKWLPIGTLIAN 366  
 St IGLEVNEFSSGSPKAQLWLA CIVGPFVWIRWFLARLNGRGLGKS-GLLKWPFGFTLIAN 359

\* \* \* \* \* \* \* \* \* \* \* \* \* \* \* \* \* P<sub>x</sub>GTxxxN

Sc VFATLLIGIFTMVQRGKKHFSTDVPIVNSLNSCHIVSALISGFCGTLSTISTFINEGYKL 337  
 At VVAACVMAALATLKK-----SVNTRTCNTVASSIQFLLGCLSTVSTFMAEFNAM 423  
 Pp LIASTLEAVLAVVIL-----V-SPDSSLARGLQVGLLGCMSTVSTFTTEVHSL 417  
 Sv VLAAGVMAALAVTSK-----VVHTKQAMTILSGIQLGFLGCLSTVSTFAAEVYTM 453  
 Ah VVAACVMAALATVKK-----SVNSRTCHTVASSIQFLLGCLSTVSTFMAEFNAM 423  
 Ls VASACIMATFATLKK-----AVKDEHFDIVATGIQFGLGCLSTVSTFIAEFGAM 405  
 Cs VSAACVMAALAIKK-----AVNTTTCHTVATGIQFGLMGCLSTVSTFMAEFHAM 459  
 Vv VSAASVMAGLSTLKK-----AVDSKNCDTIVTGIQFGLGCLSTVSTFIAEFNAM 490  
 Ca ILAADVMAALATLKK-----AVNTDKCNTVATGIQLGFLGCLSTVSTFIAEFNAM 437

|    |     |               |                                 |                   |                |             |     |
|----|-----|---------------|---------------------------------|-------------------|----------------|-------------|-----|
| Nt | VL  | AACVMAVLATLKK | -----                           | AVKTQTCETVASGIQF  | GLLGCLSTVSTFIA | EFHAM       | 416 |
| St | VS  | AACIMAALATLKK | -----                           | AVNNTETCDTVASGIQF | GLLGCLSTVSTFIA | EFHAM       | 409 |
|    |     | *             |                                 |                   |                | *LSTxSTFxxE |     |
| Sc | --- | SFINMLI       | YYTVSIAISYCLLVITLGSYAWTRGLTNPIC | -----             |                |             | 375 |
| At | RES | DYPWRAYAY     | ASFTIVVSFAIGTIIYSVPVWVIGFS      | -----             |                |             | 461 |
| Pp | RRG | SQWRAYAY      | FCIMVFSTYCMGVLVYTIAMTRHYSV      | -----             |                |             | 456 |
| Sv | RRS | GQIARAFV      | YAASTFLLSFVLGTLIYSVPVWEKHYG     | -----             |                |             | 491 |
| Ah | RES | DYPWRAYAY     | ASFTIAVSFAIGTVIYSVPVWVIGFS      | -----             |                |             | 461 |
| Ls | RES | VDPWKAYV      | YAFTTMIVSFVFGTFIYSVPVWAKSWS     | -----             |                |             | 443 |
| Cs | SQS | NHPWRAEV      | YAVITIALSFSLGTLIYSVPDWVMGYD     | -----             |                |             | 497 |
| Vv | RES | HHPWRAYAY     | AMLTIFLSFGLGTLIYSVPVWTKGYD      | -----             |                |             | 528 |
| Ca | RQS | SHTWRAYAY     | ATSTIVISFALGTLIYSVPVWVKGYD      | -----             |                |             | 475 |
| Nb | RES | KYPWRAYV      | YALSTMLMSFILGTLIYSVFWTENS       | -----             |                |             | 455 |
| St | RG  | SKYPWRAYV     | YALCTTLISFILGTLIYSLPVWVENFN     | -----             |                |             | 447 |
|    |     | *             |                                 | *                 | *              |             |     |

**B**

|             |                                                                  |     |
|-------------|------------------------------------------------------------------|-----|
| AtFEX       | MDTGQSSIEPYQAKSFSRESSVASSLSLSRSLPHLIDNDVDSESVSEAGDIGDRSLRRRH     | 60  |
| Atfex       | MDTGQSSIEPYQAKSFSRESSVASSLSLSRSLPHLIDNDVDSESVFRGRGYWGPLTSEKA     | 60  |
| PlusIntron2 | -----                                                            | 0   |
| Del17       | -----MDTSVASSLSLSRSLPHLIDNDVDSESVSEAGDIGDRSLRRRH                 | 43  |
| Del129      | -----                                                            | 0   |
|             |                                                                  |     |
| AtFEX       | SAGRSSRLSADDFIEQGTHDTSRQEQDILHDLRAFNTASVNKTLPEEDITASPLPTKSLLS    | 120 |
| Atfex       | -----                                                            | 60  |
| PlusIntron2 | -----                                                            | 0   |
| Del17       | SAGRSSRLSADDFIEQGTHDTSRQEQDILHDLRAFNTASVNKTLPEEDITASPLPTKSLLS    | 103 |
| Del129      | -----                                                            | 0   |
|             |                                                                  |     |
| AtFEX       | PEINNSGKEEERVLPKSLEYISCLIH LAVFGIFGAI TRYLLQK LFGPTGARVTS DGSILY | 180 |
| Atfex       | -----                                                            | 60  |
| PlusIntron2 | -----MPNSF---GCF-----WDFW-GHYEIFAAKIVGPTGARVTS DGSILY            | 38  |
| Del17       | PEINNSGKEEERVLPKSLEYISCLIH LAVFGIFGAI TRYLLQK LFGPTGARVTS DGSILY | 163 |
| Del129      | -----MDTEERVLPKSLEYISCLIH LAVFGIFGAI TRYLLQK LFGPTGATVTS DGSILY  | 54  |

Supplemental Figure S1: Predicted protein alignment of putative plant and yeast FEX1 sequences used in this study. (A) Alignment of predicted FEX sequences. Grey boxes indicate proposed transmembrane domains as predicted by TCoffee PSI/TM (Notredame et al., 2000) and TMHMM2.0 (Möller et al., 2001). Red lettering denotes conserved amino acids in all sequences. Stars below an amino acid indicate conservation in all plant sequences, but not in yeast FEX1. Important conserved sequences for FEX proteins are indicated underneath the alignment. Conserved Asparagines (N56 and N277) in yeast (Sc) are blue. Corresponding blue N186 and N373 in AtFEX were changed to A to test functionality of Pores I and II respectively. In order of appearance: *Saccharomyces cerevisiae*, *Arabidopsis thaliana*, *Physcomitrium patens*, *Setaria viridis*, *Arabidopsis halleri*, *Lactuca sativa*, *Camellia sinensis*, *Vitis vinifera*, *Coffea arabica*, *Nicotiana benthamiana*, and *Solanum tuberosum*. (B) Alignment of the predicted N-terminal regions encoded by the predicted sequence of the CRISPR/Cas9 mutation (*Atfex*) and the altered *AtFEX* constructs tested in yeast DKO. The CRISPR/Cas9 knock out causes a frameshift mutation which results in premature termination at amino acid 61. Del7 and Del129 are deletions of 7 and 129 AA respectively, from the AtFEX N-terminus, used to test rescue in yeast. PlusIntron2 represents a predicted protein that could be produced when the second intron is retained.

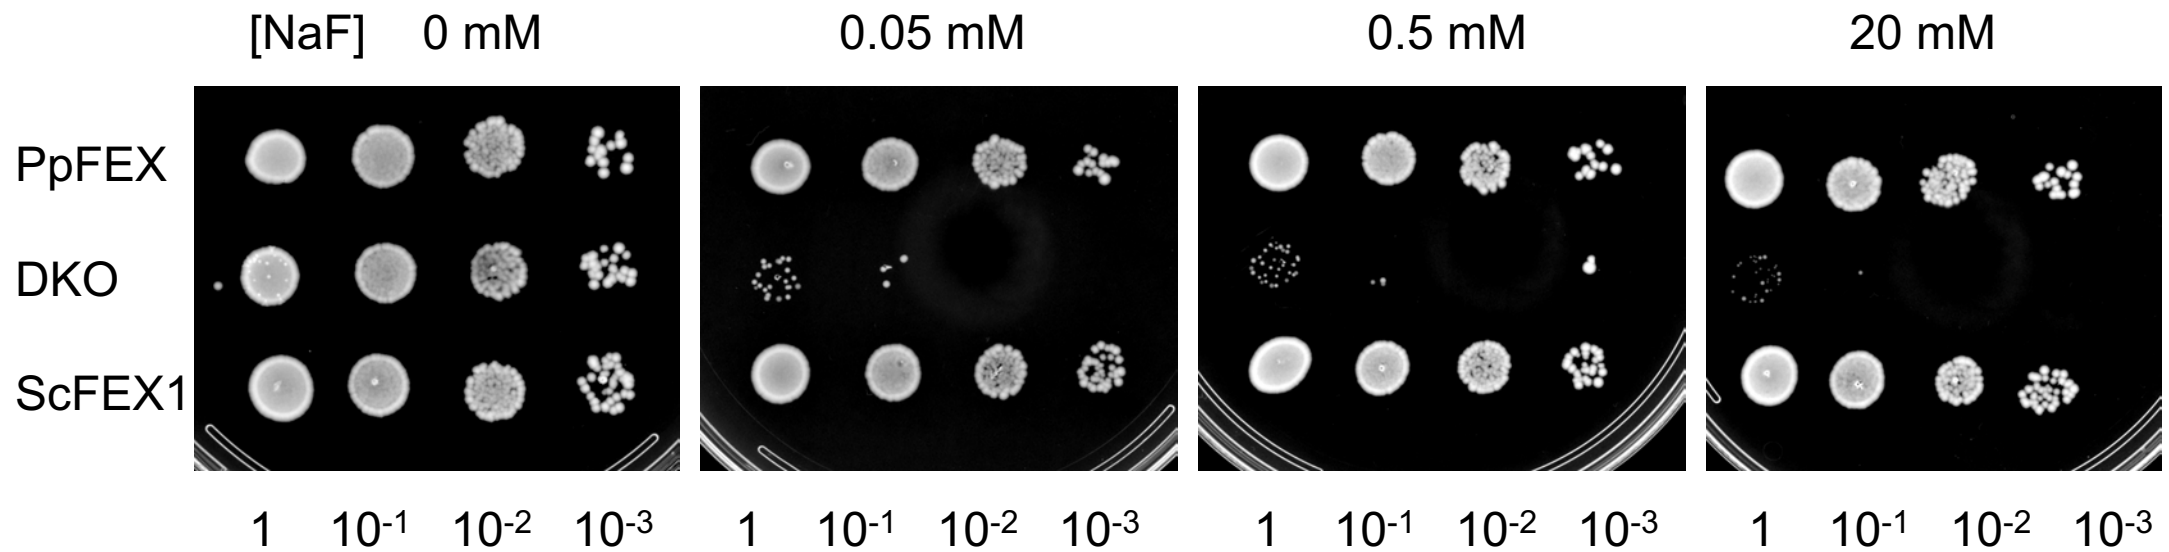

Supplemental Figure S2. An example of the serial dilution spot growth assay with plates containing different concentrations of NaF for DKO yeast rescued with either *P. patens* FEX or *S. cerevisiae* FEX1. The same data are presented in Figure 1 for *P. patens*.

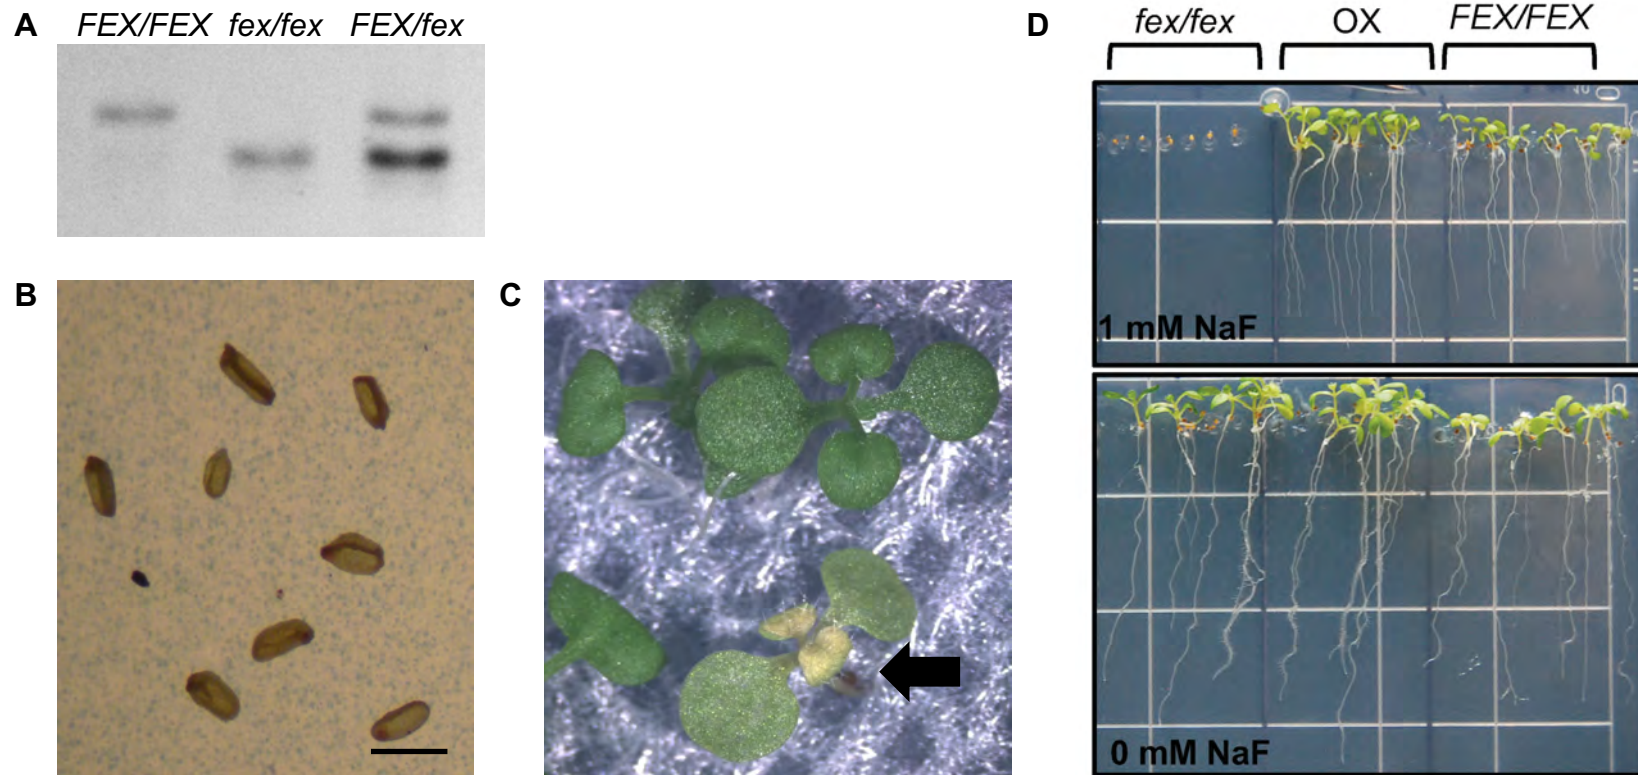

**Supplemental Figure S3.** Examples of genotypic and phenotypic data. (A) dCAPS genotype analysis where *FEX/FEX* plants contained a *HinfI* site and *fex/fex* plants did not. (B) Seeds from *fex/fex* plants appear empty and do not produce seedlings. Bar is 500  $\mu$ m (C) Yellowing leaves on *fex/fex* seedling that has been transferred to plates containing 0.25 mM NaF for 10 d. Green seedlings above were *FEX/fex* and *FEX/FEX*. Arrow points to a chlorotic *fex/fex* plant. (D) Roots grown on 0 and 1 mM NaF. All grow the same on 0 mM NaF, but in 1 mM NaF the *fex/fex* root doesn't elongate after emergence from the seed coat. The primary roots of the OX are longer than *FEX/FEX* in NaF.

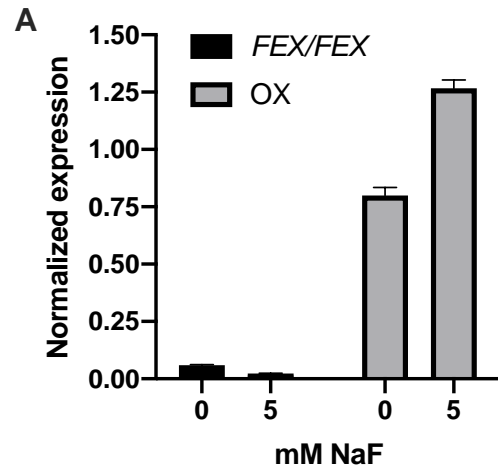

**Supplemental Figure S4.** Overexpression level of *AtFEX* and germination on NaCl. (A) OX seedlings had about 10 times the amount of *AtFEX* message as WT. The data represent three technical replicates of one trial of more than 3 trials which all had the same results. (B) NaCl had no effect on germination unlike similar concentrations of NaF. Each bar represents 2 trials of 40-70 seeds each. Error bars are SD.

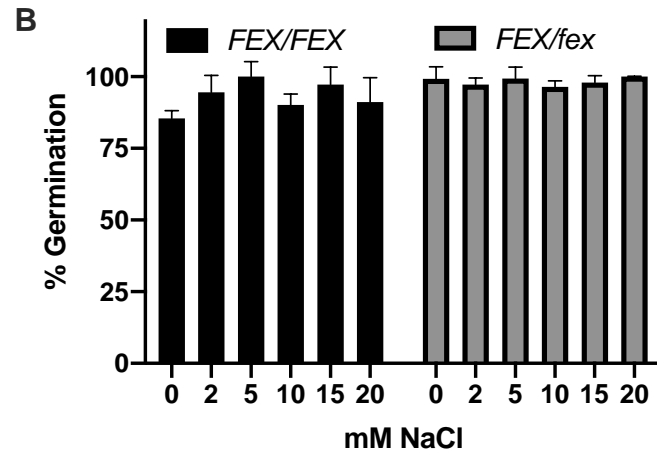

Supplemental Table S1. Primer sequences.

| Primer    | Sequence 5'-3'                                                                | Purpose                                        |
|-----------|-------------------------------------------------------------------------------|------------------------------------------------|
| FLCDSYF1  | GATTCTAGAAGCTAGTGGATCCCCCGGGCTGCAGGAATTCGATATCAATGGATACGGGTCAAAGCAGCATAGAAC   | Cloning in yeast vector pRS416GPD              |
| FLCDSYR1  | GCGTGACATAACTAATTACATGACTCGAGGTGACGGTATCGATACTAACTGAATCCTATTACCCAGACAGG       | <i>Arabidopsis thaliana</i> and <i>halleri</i> |
| SIATGF    | GATTCTAGAAGCTAGTGGATCCCCCGGGCTGCAGGAATTCGATATCAatggatagctcctcagctaggagcaatg   | <i>Setaria</i>                                 |
| SITAGR    | GCGTGACATAACTAATTACATGACTCGAGGTGACGGTATCGATAGAAAGTTGCCAAAGGTCATCCATAATGC      |                                                |
| TEAATGF   | GATTCTAGAAGCTAGTGGATCCCCCGGGCTGCAGGAATTCGATATCAATGATTGTTTTATCTTACCTTGTTCGTTGA | CsFEX                                          |
| TEAREV2   | GCGTGACATAACTAATTACATGACTCGAGGTGACGGTATCGATAgacacactaatcatagcccatgacc         |                                                |
| TOBATGF   | GATTCTAGAAGCTAGTGGATCCCCCGGGCTGCAGGAATTCGATATCAATGGATTGTGAGAATAAGGATTCTGATCTC | NbFEX                                          |
| TOBTAGR   | GCGTGACATAACTAATTACATGACTCGAGGTGACGGTATCGATAGATCTTGGCTCTAATTGGAATTTTCAGTC     |                                                |
| ATATGF    | CACCATGGATACGGGTCAAAGCAGCATAG                                                 | Cloning in pENTR/D                             |
| ATTAGR    | CTAACTGAATCCTATTACCCAGAC                                                      | AtFEX                                          |
| GLYNOATG  | CACCGGTGGAGGTGGAGGTCAAAGCAGCATAGAACC                                          |                                                |
| AtpEGHF   | GACCATCCTCCAAAATCGGATCTGGTCCGCGTGGATCCCCGGGAATGGATACGGGTCAAAGCAGCATAGAAC      | Cloning in pEGH                                |
| AtpEGHR   | GAAACGCGCGAGGCAGATCGTCAGTCAGTCACGATGAATTAAGCTTCTAACTGAATCCTATTACCCAGACAGG     | AtFEX                                          |
| CspEGHF   | GACCATCCTCCAAAATCGGATCTGGTCCGCGTGGATCCCCGGGAATGATTGTTTTATCTTACCTTGTTCGTTGA    | CsFEX                                          |
| CspEGHR   | GAAACGCGCGAGGCAGATCGTCAGTCAGTCACGATGAATTAAGCTTGACACACTAATCATAGCCCATGACCC      |                                                |
| L8015     | TGGCTGTGGCTTAAAATATGTG                                                        | CRISPR/Cas9                                    |
| L8126     | CTTTTAGTCCGGAGAGCAGTGT                                                        |                                                |
| R8256     | GCTTCTACCAGCACTATGCCTT                                                        |                                                |
| R8347     | TGAAAGCTCGAAGGTCATGTAA                                                        |                                                |
| FEX2B     | ATTGCGTCGATAGTGAGAGTGTCTCAG                                                   |                                                |
| REX2B     | AAACCTGAGACACTCTCACTATCGACG                                                   |                                                |
| pYAOF     | CCATGAGCTCATCTTCTCTTC                                                         |                                                |
| pYAOR     | GAAGAGGAAGATGAGCTCATGG                                                        |                                                |
| HinfIF    | AATTGACAATGACGTCGATAGTGAGAGTGACT                                              | dCAPS                                          |
| HinfIR    | CGAAGGTCATGTAATATATCTTGTCTTGTGACGAG                                           |                                                |
| InHinfR   | GTGACTATGCAAAGTTAGAGGTAGTCTC                                                  |                                                |
| KCN186AF  | CCTTGATCTTCCCTCCGCCATGGTAGGATCATTCTT                                          | N to A conversion in AtFEX                     |
| KCN186AR  | AAGAATGATCCTACCATGGCGGAGGGAAGATCAAGG                                          |                                                |
| KCN373AF  | GGCACCTCATTGCAGCTGTAGTTGCAGCTTGCG                                             |                                                |
| KCN373AR  | CGCAAGCTGCAACTACAGCTGCAATGAGGGTGCC                                            |                                                |
| CTPDEL    | CACCATGGATACGAGTGTAGCCTCTTCTT                                                 | N terminal deletions of AtFEX                  |
| YCTPDEL   | TCTAGAAGCTAGTGGATCCCCCGGGCTGCAGGAATTCGATATCAcaccATGGATACgagtgagcctcttctt      |                                                |
| YNTERMDEL | TCTAGAAGCTAGTGGATCCCCCGGGCTGCAGGAATTCGATATCAATGGATACGgaagagcgagtggttac        |                                                |
| QAT3338F  | TTGAAAATTGGAGTACCGTACCAA                                                      | qPCR                                           |
| QAT3338R  | TCCCTCGTATACATCTGGCCA                                                         | At4g33380                                      |
| QTIPATR   | TCAACTGGATACCCCTTTCGCA                                                        |                                                |
| QTIPATF   | GTGAAAAGCTGTTGGAGAGAAGCAA                                                     | At4g34270 (TIP41-like)                         |
| QFEXF1    | TGTAACACGGTTGCTTCGAG                                                          |                                                |
| QFEXR1    | CAATCGAAAAGAAACCACA                                                           | 3' end of AtFEX                                |
